# Supplementary material for: Significance of exercise in nonalcoholic fatty liver disease in men: a community-based large cross-sectional study
Source: Springer Nature journal article supplement (doi:10.1007/s00535-014-0959-6), 2014-04-20
Supplement: MOESM1 [file 535_2014_959_MOESM1_ESM.docx]

**Supplementary Table 1. Association between different combinations of lifestyle-related risk factors and the prevalence of NAFLD in men**

| Lifestyle factor | | | |
| --- | --- | --- | --- |
| Habitual exercise | Habitual snacking | Short sleep duration | PR of NAFLD (%) |
| NO | YES | YES | 45.5 |
| NO | 47.1 |
| NO | YES | 43.2 |
| NO | 38.4 |
| YES | YES | YES | 29.7 |
| NO | 34.9 |
| NO | YES | 30.6 |
| NO | 25.5 |

NAFLD, nonalcoholic fatty liver disease; PR, prevalence rate

**Supplementary Table 2. Association between different combinations of lifestyle-related risk factors and the prevalence of NAFLD in women**

| Lifestyle factor | | | |
| --- | --- | --- | --- |
| Habitual exercise | Habitual snacking | Short sleep duration | PR of NAFLD (%) |
| NO | YES | YES | 14.5 |
| NO | 11.1 |
| NO | YES | 10.2 |
| NO | 10.5 |
| YES | YES | YES | 13.1 |
| NO | 10.2 |
| NO | YES | 12.2 |
| NO | 12.7 |

NAFLD, nonalcoholic fatty liver disease; PR, prevalence rate
